# Supplementary material for: Facile engineering of CoS/rGO heterostructures on carbon cloth for efficient all-pH hydrogen evolution reaction and alkaline water electrolysis
Source: Royal Society of Chemistry journal article supplement (doi:10.1039/d4ta06710j), 2024-11-15
Supplement: d4ta06710j1.pdf [file d4ta06710j1.pdf]

## Electronic Supplementary Material

# **Facile engineering of CoS/rGO heterostructures on carbon cloth for efficient all-pH hydrogen evolution reaction and alkaline water electrolysis**

*Yuxian Chen,<sup>a</sup> Jiayi Rong,<sup>a</sup> Qiaolin Fan,<sup>a</sup> Meng Sun,<sup>a</sup> Qiuyi Deng,<sup>a</sup> Zhonghua Ni,<sup>a</sup>*

*Xiao Li,<sup>a\*</sup> Tao Hu,<sup>a\*</sup>*

<sup>a</sup> School of Mechanical Engineering, Jiangsu Key Laboratory for Design and Manufacture of Micro-Nano Biomedical Instruments, Southeast University, Nanjing, Jiangsu Province, China, 211189

### **Corresponding Author**

\*E-mail: hutao@seu.edu.cn (Tao Hu), lx2016@seu.edu.cn (Xiao Li)

## **This file contains:**

1. Supporting figures: Figure S1~S17
2. Supporting table: Table S1~S10

## 1. Supporting figures: Figure S1~S12

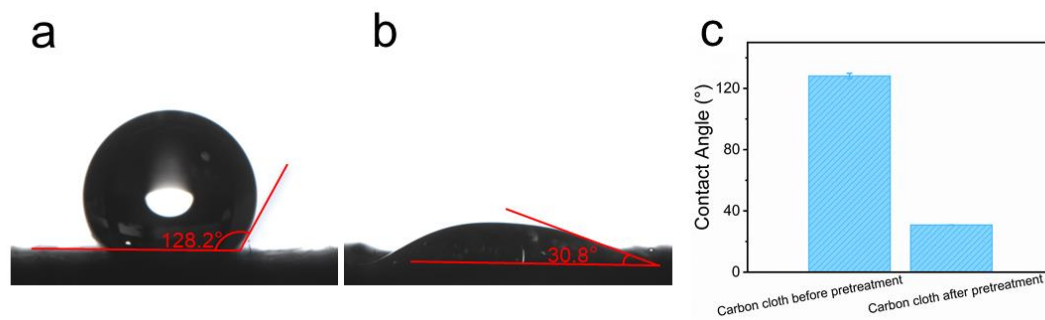

**Figure S1.** Contact angle measurements of carbon cloth before and after pretreatment. (a) Contact angle of pure CC before pretreatment. (b) Contact angle of pure CC after pretreatment. (c) Comparison of contact angles of carbon cloth before and after pretreatment.

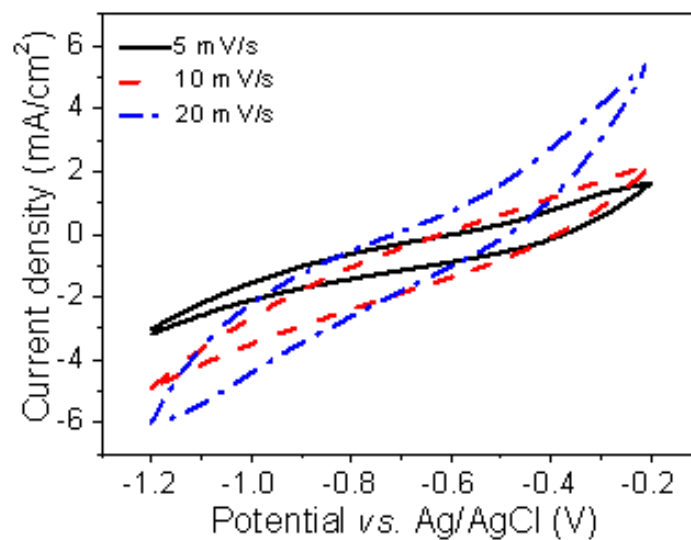

**Figure S2.** Cyclic voltammetric deposition curves of CoS at different scanning rates.

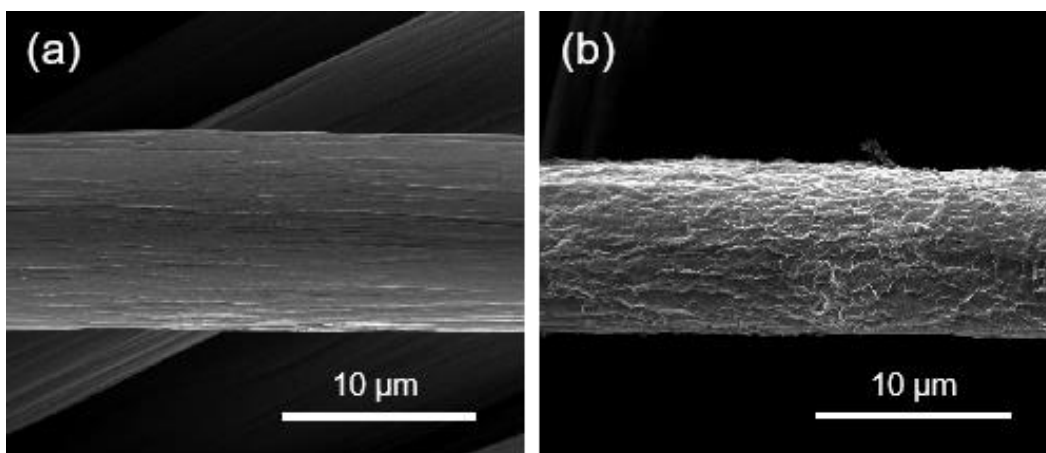

**Figure S3.** (a) SEM images for the carbon cloth (CC); (b) SEM images for the graphene oxide /carbon cloth (rGO@CC).

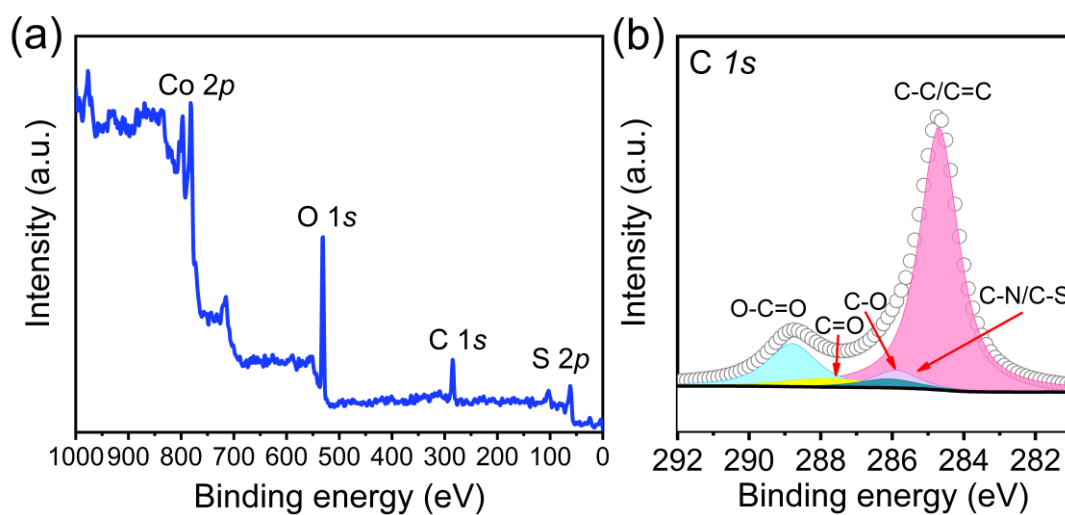

**Figure S4.** (a) XPS survey spectrum of CoS/rGO@CC verifies the presence of Co, O, C and S components in the material. High-resolution (b) C 1s spectra disclose the detailed chemical valences for C element.

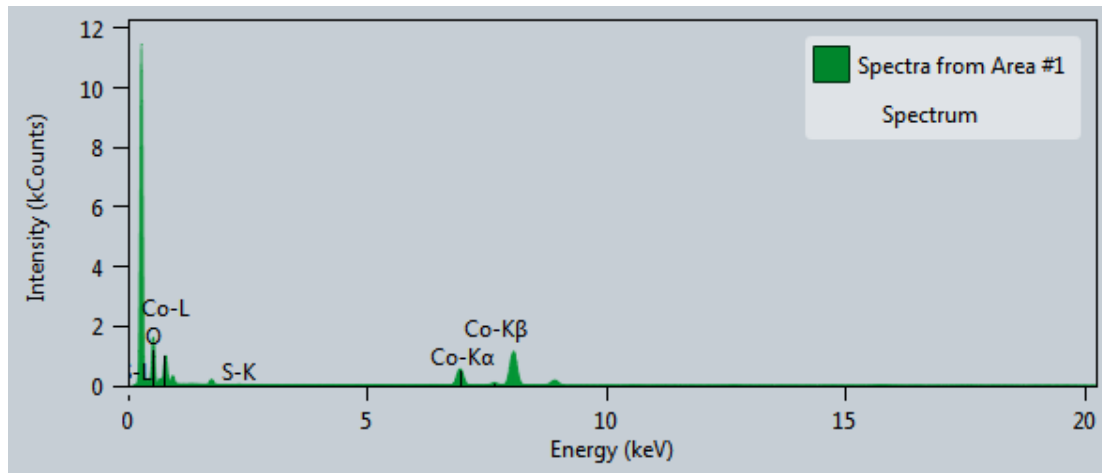

**Figure S5.** The EDX spectrum of CoS nanosheets on the copper mesh revealed the presence of both Co and S components in the composite material, indicating the successful synthesis of CoS.

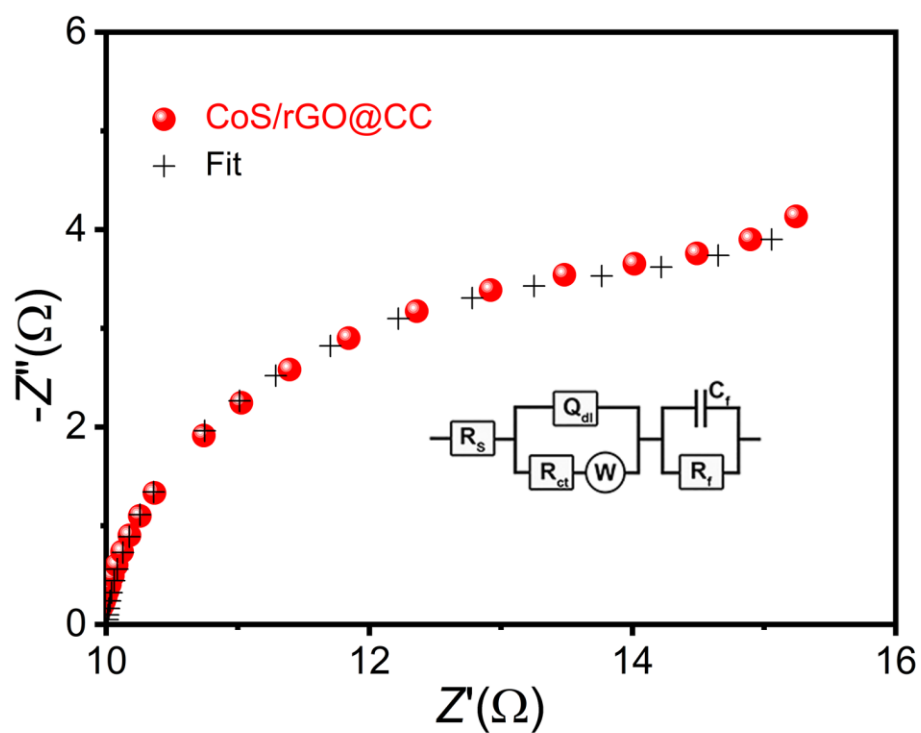

**Figure S6.** Nyquist plots of EIS and the corresponding fitting curve for the CoS/rGO@CC electrode, demonstrating excellent agreement between the fitting results and experimental data. The inset displays the equivalent circuit diagram.

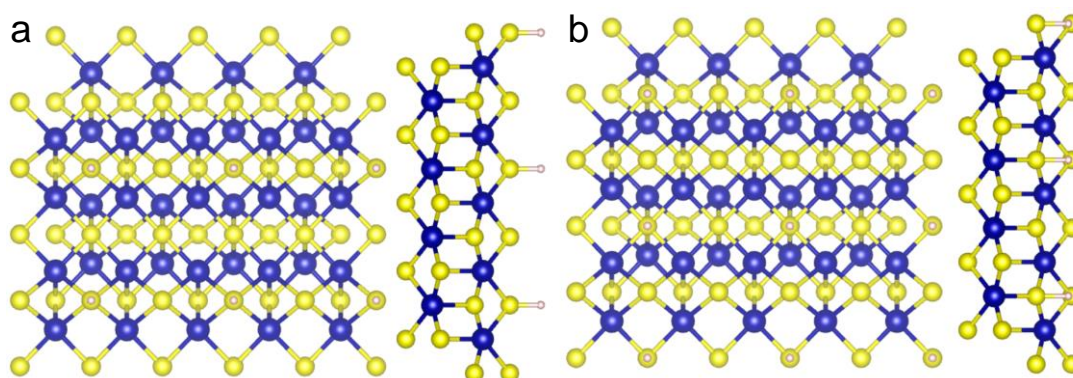

**Figure S7.** HER (S site adsorption) structure of pure CoS.

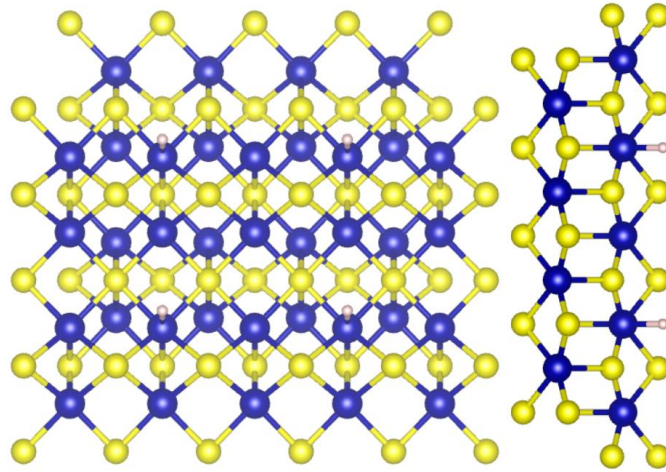

**Figure S8.** HER (Co site adsorption) structure of pure CoS, (a) top view (left) and (b) side view (right).

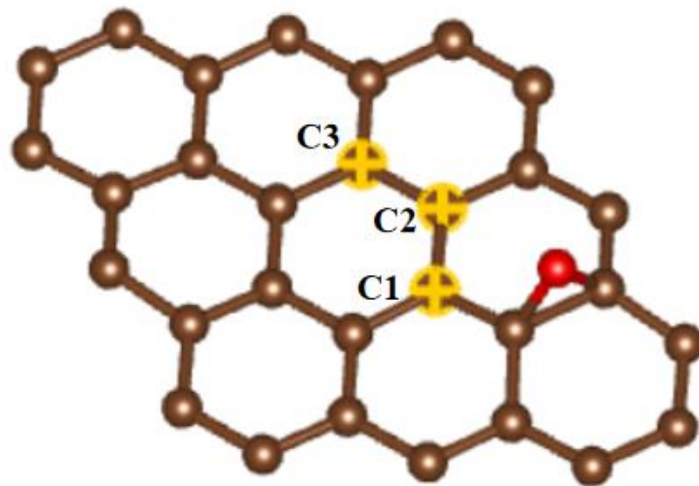

**Figure S9.** rGO sites in DFT calculations.

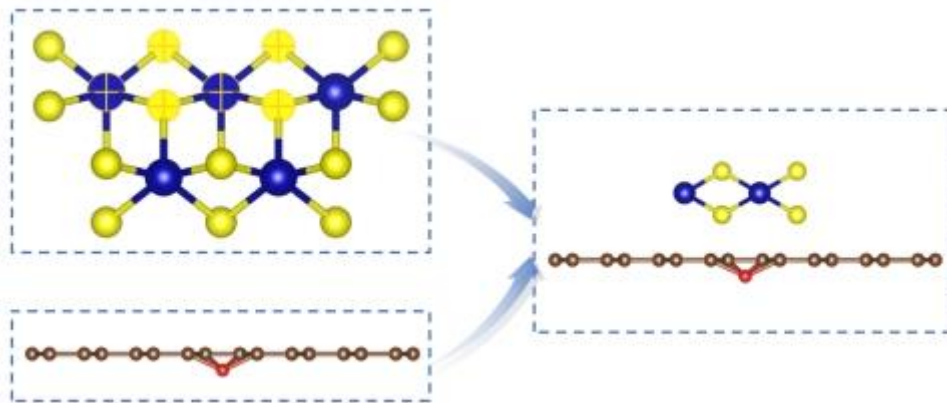

**Figure S10.** Design idea of DFT computational modeling.

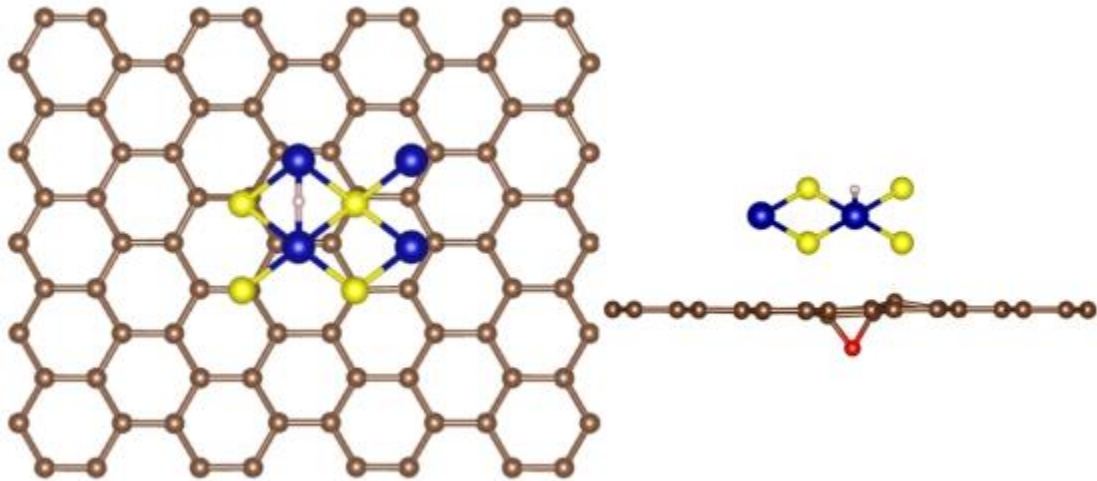

**Figure S11.** HER structure of CoS/rGO combined model, (a) top view (left) and (b) side view (right).

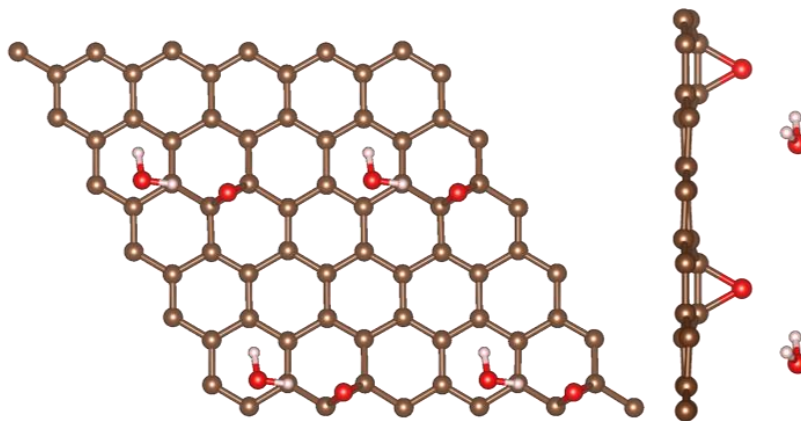

**Figure S12.** Water ion adsorption configuration of pure rGO during the HER process, (a) top view (left) and (b) side view (right).



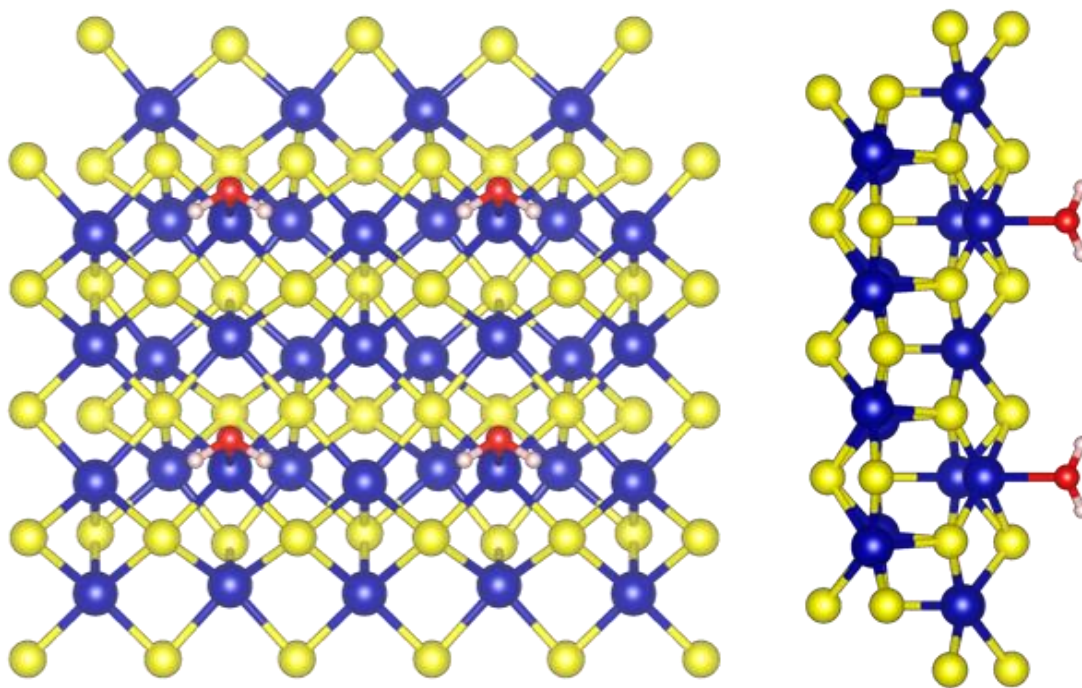

**Figure S13.** Water ion adsorption configuration of pure CoS during the HER process,  
(a) top view (left) and (b) side view (right).

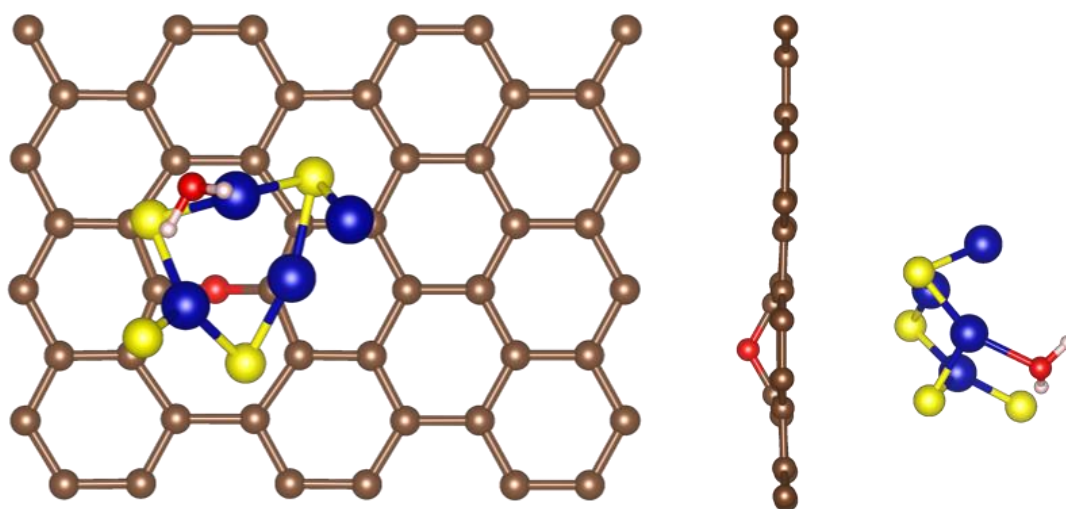

**Figure S14.** Water ion adsorption configuration of CoS/rGO during the HER process,  
(a) top view (left) and (b) side view (right).

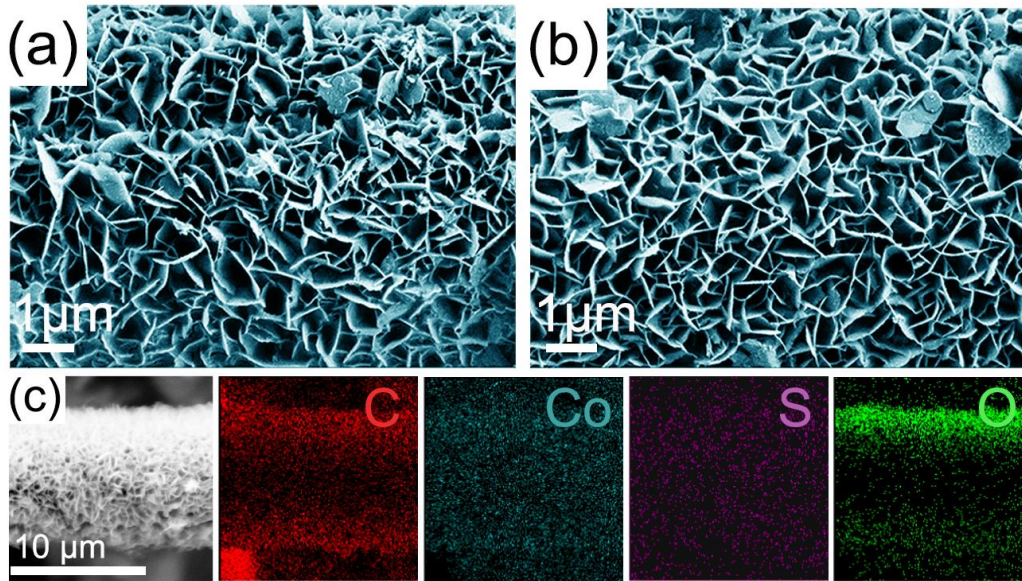

**Figure S15.** (a-b) presents SEM images of CoS/rGO@CC after stability test, while (c) displays elemental mappings of C, Co, S, and O.

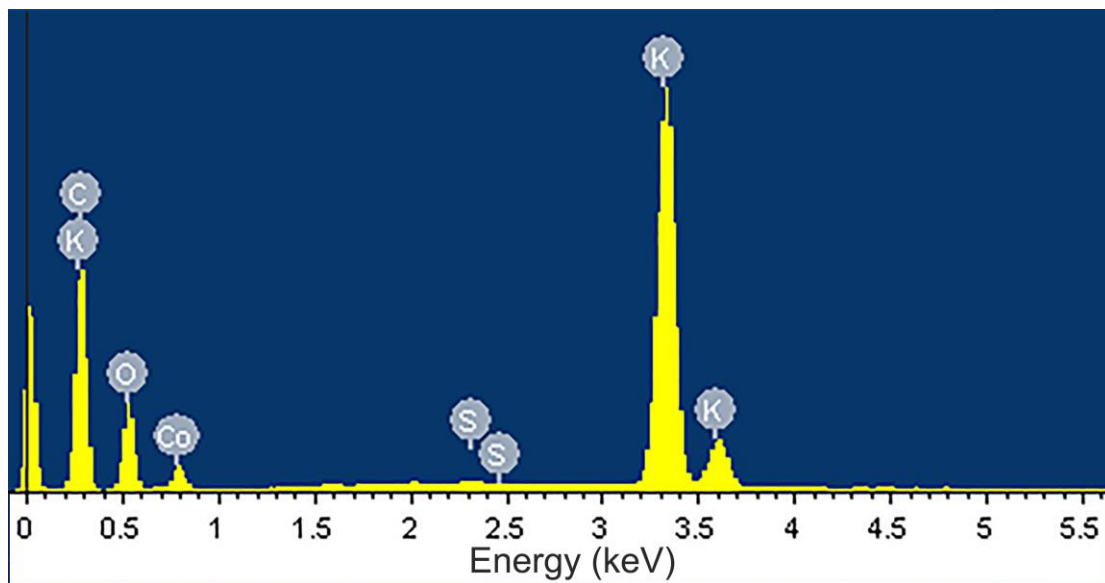

**Figure S16.** The EDX spectrum of CoS/rGO@CC after stability test.

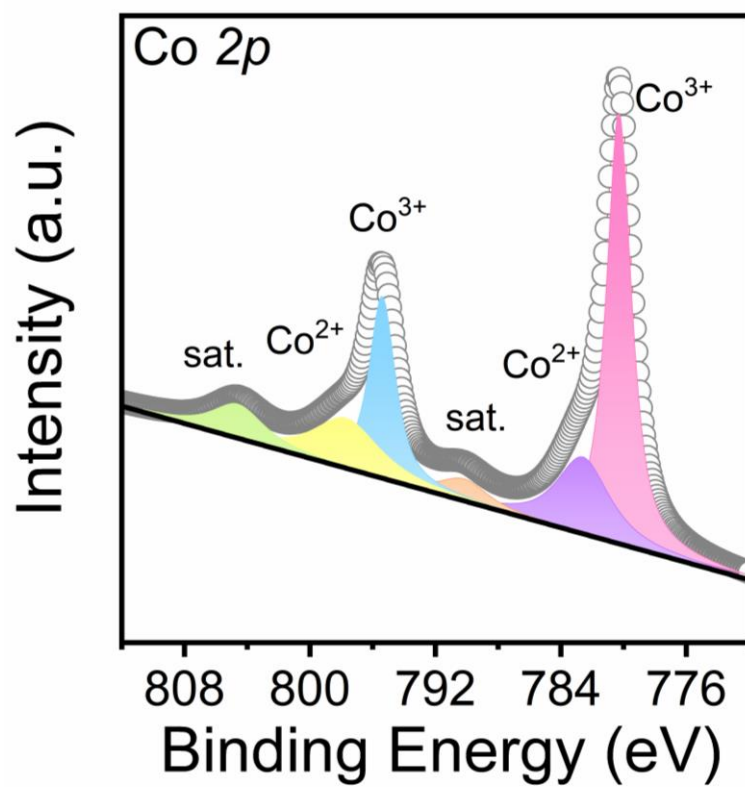

**Figure S17.** High-resolution Co 2p XPS spectra of CoS/rGO@CC after the OER reaction.

## 2. Supporting tables: Table S1~S10

**Table S1.** Comparison of HER activity of CoS/rGO@CC catalyst with other reference electrodes in 1 M KOH.

| Electrolyte | Electrode  | Onset potential (mV) | Potential at 10 mA cm <sup>-2</sup> (mV) | Potential at 50 mA cm <sup>-2</sup> (mV) | Tafel slope (mV dec <sup>-1</sup> ) |
|-------------|------------|----------------------|------------------------------------------|------------------------------------------|-------------------------------------|
| 1 M KOH     | 20% Pt/C   | 6.3                  | 47.3                                     | 169.3                                    | 31.2                                |
|             | CoS/rGO@CC | 6.3                  | 76.3                                     | 226.3                                    | 69                                  |
|             | CoS@CC     | 230.3                | 441.3                                    | 707.3                                    | 194                                 |
|             | rGO@CC     | 296.3                | 573.3                                    | 815.3                                    | 237                                 |

**Table S2.** Comparison of the HER performance of CoS/rGO@CC catalyst with recent state-of-the-art cobalt-based catalysts in KOH.

| Electrolyte | Catalyst                                   | $\eta_{10}$<br>(mV) | Tafel slope<br>(mV dec <sup>-1</sup> ) | Stability time | Reference |
|-------------|--------------------------------------------|---------------------|----------------------------------------|----------------|-----------|
| 1 M KOH     | CoS/rGO@CC                                 | 76.3                | 69                                     | 24             | This work |
|             | CoSe/Ti                                    | 121                 | 84                                     | 27 h           | [1]       |
|             | CoS <sub>2</sub> /MoS <sub>2</sub> /NC-25% | 215                 | 80                                     | N.A.           | [2]       |
|             | PNC/Co                                     | 298                 | 131                                    | 10 h           | [3]       |
|             | Co <sub>4</sub> S <sub>3</sub> -NSC        | 352.3               | 150.6                                  | N.A.           | [4]       |
|             | Co-2-Ni-0.5-NC                             | 359                 | 373.6                                  | N.A.           | [5]       |
|             | Co-NRCNTs                                  | 370                 | N.A.                                   | 10 h           | [6]       |
|             | Co/NGC                                     | 392                 | 145                                    | N.A.           | [7]       |

**Table S3.** Comparison of OER activity of CoS/rGO@CC catalyst with other reference electrodes in 1 M KOH.

| Electrolyte | Electrode              | Onset potential<br>(mV) | Potential at 10<br>mA cm <sup>-2</sup> (mV) | Potential at 50<br>mA cm <sup>-2</sup> (mV) | Tafel slope<br>(mV dec <sup>-1</sup> ) |
|-------------|------------------------|-------------------------|---------------------------------------------|---------------------------------------------|----------------------------------------|
| 1 KOH       | RuO <sub>2</sub> on CC | 325.4                   | 400.4                                       | 543.4                                       | 106.7                                  |
|             | CoS/rGO@CC             | 232.4                   | 290.4                                       | 398.4                                       | 71                                     |
|             | CoS@CC                 | 364.4                   | 525.4                                       | 794.4                                       | 254                                    |
|             | rGO@CC                 | 406.4                   | 605.4                                       | >1000                                       | 332                                    |

**Table S4.** Comparison of the OER performance of CoS/rGO@CC catalyst with recent state-of-the-art cobalt-based catalysts in 1 M KOH.

| Electrolyte | Catalyst                                                           | $\eta_{10}$<br>(mV) | Tafel slope<br>(mV dec <sup>-1</sup> ) | Stability time | Reference |
|-------------|--------------------------------------------------------------------|---------------------|----------------------------------------|----------------|-----------|
|             | CoS/rGO@CC                                                         | 290.4               | 71                                     | 24 h           | This work |
|             | CoSe <sub>2</sub> @C-CNT                                           | 310                 | 69                                     | N. A.          | [8]       |
|             | CoSe <sub>2</sub> @NC                                              | 246.7               | 72.66                                  | 132            | [9]       |
|             | Co-N <sub>x</sub>  P-GC/FEG                                        | 320                 | 54                                     | 10 h           | [10]      |
| 1 M KOH     | P-CoS <sub>2</sub> -HNA/CC                                         | 250                 | 90                                     | 24 h           | [11]      |
|             | EG/Ni <sub>3</sub> Se <sub>2</sub> /Co <sub>9</sub> S <sub>8</sub> | 390                 | 131                                    | 10 h           | [12]      |
|             | EG/H-Co <sub>0.85</sub> Se P                                       | 410                 | 76                                     | 10 h           | [13]      |
|             | CoSe <sub>2</sub> @VG/CC                                           | 418                 | 74                                     | 25 h           | [14]      |
|             | NiO/Co <sub>3</sub> O <sub>4</sub>                                 | 240                 | 73                                     | 48 h           | [15]      |

**Table S5.** The charge-transfer resistance (Rct) of different electrodes.

| Electrode              | Rct                |           |
|------------------------|--------------------|-----------|
|                        | Value ( $\Omega$ ) | Error (%) |
| 20% Pt/C               | 3423               | 2.034     |
| RuO <sub>2</sub> on CC | 7.2357             | 0.649     |
| CoS/rGO@CC             | 6.3                | 6.955     |
| CoS@CC                 | 374.41             | 0.792     |
| rGO@CC                 | 103.54             | 0.895     |
| CC                     | 1365               | 0.684     |



**Table S6.** Comparison of overall water splitting voltages with various recently reported catalysts.

| Electrolyte                                                                                                                                                                                     | Catalyst                                                                                                       | Voltage<br>(mV) | Reference |
|-------------------------------------------------------------------------------------------------------------------------------------------------------------------------------------------------|----------------------------------------------------------------------------------------------------------------|-----------------|-----------|
| 1 M KOH                                                                                                                                                                                         | CoS/rGO@CC  CoS/rGO@CC                                                                                         | 744             | This work |
|                                                                                                                                                                                                 | CoS/rGO@CC  20% Pt/C                                                                                           | 925             | This work |
|                                                                                                                                                                                                 | CoS/rGO@CC  RuO <sub>2</sub> on CC                                                                             | 1005            | This work |
|                                                                                                                                                                                                 | RuO <sub>2</sub> @Co <sub>3</sub> O <sub>4</sub> (1:6)  RuO <sub>2</sub> @Co <sub>3</sub> O <sub>4</sub> (1:6) | 1460            | [16]      |
|                                                                                                                                                                                                 | DH-CuCo-P @ NC/CC  DH-CuCo-P @<br>NC/CC                                                                        | 1494            | [17]      |
|                                                                                                                                                                                                 | 1T'/1T Co,P-SnS <sub>2</sub>   1T'/1T Co,P-SnS <sub>2</sub>                                                    | 1530            | [18]      |
|                                                                                                                                                                                                 | CoMoP@Co <sub>3</sub> O <sub>4-x</sub>   CoMoP@Co <sub>3</sub> O <sub>4-x</sub>                                | 1614            | [19]      |
|                                                                                                                                                                                                 | Co <sub>3</sub> O <sub>4</sub> -Mo <sub>2</sub> N NFs  Co <sub>3</sub> O <sub>4</sub> -Mo <sub>2</sub> N NFs   | 1650            | [20]      |
|                                                                                                                                                                                                 | VOB-Co <sub>3</sub> O <sub>4</sub> /NF  VOB-Co <sub>3</sub> O <sub>4</sub> /NF                                 | 1670            | [21]      |
| Co <sub>6</sub> Mo <sub>6</sub> C <sub>2</sub> /Co <sub>2</sub> Mo <sub>3</sub> O <sub>8</sub>   Co <sub>6</sub> Mo <sub>6</sub> C <sub>2</sub> /Co <sub>2</sub> Mo <sub>3</sub> O <sub>8</sub> | 1810                                                                                                           | [22]            |           |

**Table S7.** Comparison of HER activity of CoS/rGO@CC catalyst with other reference electrodes in 0.5 M H<sub>2</sub>SO<sub>4</sub>.

| Electrolyte                          | Electrode   | Onset potential (mV) | Potential at 10 mA cm <sup>-2</sup> (mV) | Potential at 50 mA cm <sup>-2</sup> (mV) | Tafel slope (mV dec <sup>-1</sup> ) |
|--------------------------------------|-------------|----------------------|------------------------------------------|------------------------------------------|-------------------------------------|
| 0.5 M H <sub>2</sub> SO <sub>4</sub> | 20% Pt/C    | 15.4                 | 31.4                                     | 82.4                                     | 34.1                                |
|                                      | CoS/rGO @CC | 12.4                 | 41.4                                     | 121.4                                    | 45.2                                |
|                                      | CoS@CC      | 45.4                 | 113.4                                    | 363.4                                    | 112                                 |
|                                      | rGO@CC      | 53.4                 | 132.4                                    | 412.4                                    | 135.4                               |

**Table S8.** Comparison of the HER performance of CoS/rGO@CC catalyst with recent state-of-the-art cobalt-based catalysts in 0.5 M H<sub>2</sub>SO<sub>4</sub>.

| Electrolyte                    | Catalyst                    | $\eta_{10}$<br>(mV) | Tafel slope<br>(mV dec <sup>-1</sup> ) | Stability time | Reference |
|--------------------------------|-----------------------------|---------------------|----------------------------------------|----------------|-----------|
|                                | CoS/rGO@CC                  | 41                  | 45                                     | 24             | This work |
|                                | Co-P@PC-750                 | 72                  | 49                                     | 20 h           | [23]      |
|                                | Fe/P-CoS <sub>2</sub>       | 80                  | 56                                     | 10 h           | [24]      |
| 0.5 M                          | CoP NFs                     | 122                 | 54.8                                   | N. A.          | [25]      |
| H <sub>2</sub> SO <sub>4</sub> | CoP/Ni <sub>2</sub> P@HPNCP | 130                 | 64.91                                  | 30 h           | [25]      |
|                                | Fe-CoSe <sub>2</sub> @NC    | 143                 | 40.9                                   | 48 h           | [26]      |
|                                | CoP/CN@ MoS <sub>2</sub>    | 144                 | 69                                     | N. A.          | [27]      |
|                                | Sn-CoS <sub>2</sub> /CC     | 161                 | 94                                     | 32 h           | [28]      |
|                                | Co-NRCNTs                   | 260                 | 69                                     | 8.5 h          | [6]       |

**Table S9.** Comparison of HER activity of CoS/rGO@CC catalyst with other reference electrodes in 1 M PBS.

| Electrolyte | Electrode      | Onset potential<br>(mV) | Potential at 10<br>mA cm <sup>-2</sup> (mV) | Potential at 50<br>mA cm <sup>-2</sup> (mV) | Tafel slope<br>(mV dec <sup>-1</sup> ) |
|-------------|----------------|-------------------------|---------------------------------------------|---------------------------------------------|----------------------------------------|
|             | 20% Pt/C       | 95.7                    | 302.7                                       | 482.7                                       | 168.8                                  |
| 1 M PBS     | CoS/rGO<br>@CC | 87.7                    | 315.7                                       | 549.7                                       | 201.99                                 |
|             | CoS@CC         | 124.7                   | 367.7                                       | 710.7                                       | 243.05                                 |
|             | rGO@CC         | 122.7                   | 610.7                                       | >1000                                       | 379.2                                  |

**Table S10.** In neutral media, the HER performance of the CoS-rGO@CC catalyst is compared with that of recent advanced catalysts.

| Electrolyte      | Catalyst              | $\eta_{10}$<br>(mV) | Tafel slope<br>(mV dec <sup>-1</sup> ) | Stability<br>time | Refer<br>ence |
|------------------|-----------------------|---------------------|----------------------------------------|-------------------|---------------|
| Natural<br>Media | CoS/rGO@CC            | 315                 | 202                                    | 22                | This<br>work  |
|                  | CoO/CoSe <sub>2</sub> | 337                 | 131                                    | 9 h               | [29]          |
|                  | FeP NPs@NPC           | 433                 | 149                                    | 10 h              | [30]          |
|                  | FeP/NCNSs             | 409                 | 92                                     | 10 h              | [31]          |
|                  | HF-MoSP-800           | 456                 | N. A.                                  | N. A.             | [32]          |
|                  | Fe@N-CNT/IF           | 525                 | 199.6                                  | 12 h              | [33]          |
|                  | NiS <sub>x</sub> film | 576                 | 123                                    | N. A.             | [34]          |
|                  | CuS nanoparticles     | 584                 | 316                                    | 14 h              | [35]          |

## References

- [1] T. Liu, Q. Liu, A.M. Asiri, et al., An amorphous CoSe film behaves as an active and stable full water-splitting electrocatalyst under strongly alkaline conditions, *Chem. Commun.* 51 (2015) 16683-16686.
- [2] K. Ji, K. Matras-Postolek, R. Shi, et al., MoS<sub>2</sub>/CoS<sub>2</sub> heterostructures embedded in N-doped carbon nanosheets towards enhanced hydrogen evolution reaction, *J. Alloys Compd.* 891 (2022) 161962.
- [3] X. Li, Z. Niu, J. Jiang, et al., Cobalt nanoparticles embedded in porous N-rich carbon as an efficient bifunctional electrocatalyst for water splitting, *J. Mater. Chem. A* 4 (2016) 3204-3209.
- [4] Y. Liu, X. Luo, C. Zhou, et al., A modulated electronic state strategy designed to integrate active HER and OER components as hybrid heterostructures for efficient overall water splitting, *Appl. Catal. B: Environ.* 260 (2020) 118197.
- [5] X. Shen, W. Tan, Z. Wei, et al., Co-modified Ni/N-doped carbon as electrocatalysts for HER and OER, *J. Mater. Sci.: Mater. Electron.* 32 (2021) 22974-22983.
- [6] X. Zou, X. Huang, A. Goswami, et al., Cobalt-Embedded Nitrogen-Rich Carbon Nanotubes Efficiently Catalyze Hydrogen Evolution Reaction at All pH Values, *Angew. Chem. Int. Ed.* 53 (2014) 4372-4376.
- [7] J. Li, Y. Kang, D. Liu, et al., Nitrogen-Doped Graphitic Carbon-Supported Ultrafine Co Nanoparticles as an Efficient Multifunctional Electrocatalyst for HER and Rechargeable Zn-Air Batteries, *ACS Appl. Mater. Inter.* 12 (2020) 5717-5729.

- [8] M. Yuan, M. Wang, P. Lu, et al., Tuning carbon nanotube-grafted core-shell-structured cobalt selenide@carbon hybrids for efficient oxygen evolution reaction, *J. Colloid Interface Sci.* 533 (2019) 503-512.
- [9] J. Lu, S. Wang, C. Ding, et al., Metal organic frameworks derived CoSe<sub>2</sub>@N-Doped-carbon-nanorods as highly efficient electrocatalysts for oxygen evolution reaction, *J. Alloys Compd.* 778 (2019) 134-140.
- [10] Y. Hou, M. Qiu, T. Zhang, et al., Efficient Electrochemical and Photoelectrochemical Water Splitting by a 3D Nanostructured Carbon Supported on Flexible Exfoliated Graphene Foil, *Adv. Mater.* 29 (2017) 1604480.
- [11] Y. Li, Z. Mao, Q. Wang, et al., Hollow nanosheet array of phosphorus-anion-decorated cobalt disulfide as an efficient electrocatalyst for overall water splitting, *Chem. Eng. J.* 390 (2020) 124556.
- [12] Y. Hou, M. Qiu, G. Nam, et al., Integrated Hierarchical Cobalt Sulfide/Nickel Selenide Hybrid Nanosheets as an Efficient Three-dimensional Electrode for Electrochemical and Photoelectrochemical Water Splitting, *Nano Lett.* 17 (2017) 4202-4209.
- [13] Y. Hou, M. Qiu, T. Zhang, et al., Ternary Porous Cobalt Phosphoselenide Nanosheets: An Efficient Electrocatalyst for Electrocatalytic and Photoelectrochemical Water Splitting, *Adv. Mater.* 29(35) (2017) 1701589.
- [14] Z. Xia, H. Sun, X. He, et al., In situ construction of CoSe<sub>2</sub>@vertical-oriented graphene arrays as self-supporting electrodes for sodium-ion capacitors and electrocatalytic oxygen evolution, *Nano Energy.* 60 (2019) 385-393.

- [15] M. Tahir, L. Pan, R. Zhang, et al., High-Valence-State NiO/Co<sub>3</sub>O<sub>4</sub> Nanoparticles on Nitrogen-Doped Carbon for Oxygen Evolution at Low Overpotential, *ACS Energy Lett.* 2 (2017) 2177-2182.
- [16] Y. Jiang, H. Liu, Y. Jiang, et al., Adjustable heterointerface-vacancy enhancement effect in RuO<sub>2</sub>@Co<sub>3</sub>O<sub>4</sub> electrocatalysts for efficient overall water splitting, *Appl. Catal. B: Environ.* 324 (2023) 122294.
- [17] B.C. Lund, T.E. Abrams, A.A. Gravely, Rebuttal to Gravely et al. Validity of PTSD diagnoses in VA administrative data: comparison of VA administrative PTSD diagnoses to self-reported PTSD Checklist scores, *J. Rehabil. Res. Dev.* 48(1) (2011) 21-30.
- [18] M. Singh, T.T. Nguyen, P.M.A., et al., Metallic Metastable Hybrid 1T'/1T Phase Triggered Co,P-SnS<sub>2</sub> Nanosheets for High Efficiency Trifunctional Electrocatalyst, *Small.* 19 (2023) e2206726.
- [19] Y. Hao, G. Du, Y. Fan, et al., Mo/P Dual-Doped Co/Oxygen-Deficient Co<sub>3</sub>O<sub>4</sub> Core-Shell Nanorods Supported on Ni Foam for Electrochemical Overall Water Splitting, *ACS Appl. Mater. Inter.* 13 (2021) 55263-55271.
- [20] T. Wang, P. Wang, W. Zang, et al., Nanoframes of Co<sub>3</sub>O<sub>4</sub>-Mo<sub>2</sub>N Heterointerfaces Enable High-Performance Bifunctionality toward Both Electrocatalytic HER and OER, *Adv. Funct. Mater.* 32(7) (2021) 2107382.
- [21] H. Yuan, S. Wang, Z. Ma, et al., Oxygen vacancies engineered self-supported B doped Co<sub>3</sub>O<sub>4</sub> nanowires as an efficient multifunctional catalyst for electrochemical water splitting and hydrolysis of sodium borohydride, *Chem. Eng. J.* 404 (2021) 126474.



- [22] R. Liu, M. Anjass, S. Greiner, et al., Bottom-up Design of Bimetallic Cobalt-Molybdenum Carbides/Oxides for Overall Water Splitting, *Chemistry*. 26 (2020) 4157-4164.
- [23] J. Wu, D. Wang, S. Wan, et al., An efficient cobalt phosphide electrocatalyst derived from cobalt phosphonate complex for all-pH hydrogen evolution reaction and overall water splitting in alkaline solution, *Small*. 16(15) (2020) 1900550.
- [24] Y.Y. Zhang, X. Zhang, Z.Y. Wu, et al., Fe/P dual doping boosts the activity and durability of CoS<sub>2</sub> polycrystalline nanowires for hydrogen evolution, *J. Mater. Chem. A*. 7 (2019) 5195-5200.
- [25] L. Ji, J. Wang, X. Teng, et al., CoP Nanoframes as Bifunctional Electrocatalysts for Efficient Overall Water Splitting, *ACS Catal*. 10 (2019) 412-419.
- [26] X. Wu, S. Han, D. He, et al., Metal Organic Framework Derived Fe-Doped CoSe<sub>2</sub> Incorporated in Nitrogen-Doped Carbon Hybrid for Efficient Hydrogen Evolution, *ACS Sustain. Chem. Eng*. 6 (2018) 8672-8678.
- [27] J. G. Li, K. Xie, H. Sun, et al., Template-directed bifunctional dodecahedral CoP/CN@MoS<sub>2</sub> electrocatalyst for high efficient water splitting, *ACS Appl. Mater. Inter*. 11 (2019) 36649-36657.
- [28] F. Liu, W. He, Y. Li, et al., Activating sulfur sites of CoS<sub>2</sub> electrocatalysts through tin doping for hydrogen evolution reaction, *Appl. Surf. Sci*. 546 (2021) 149101.
- [29] T. Feng, F. Wang, J. Lei, et al., A universal CoO/CoSe<sub>2</sub> heterostructure electrocatalyst towards hydrogen evolution reaction via in-situ partial surface-oxidation-selenization method, *Mater. Chem. Phys*. 267 (2021) 124644.

- [30] Z. Pu, I. S. Amiin, C. Zhang, et al., Phytic acid-derivative transition metal phosphides encapsulated in N,P-codoped carbon: an efficient and durable hydrogen evolution electrocatalyst in a wide pH range, *Nanoscale* 9 (2017) 3555-3560.
- [31] Y. Yu, Z. Peng, M. Asif, et al., FeP Nanocrystals Embedded in N-Doped Carbon Nanosheets for Efficient Electrocatalytic Hydrogen Generation over a Broad pH Range, *ACS Sustain. Chem. Eng.* 6 (2018) 11587-11594.
- [32] A. Wu, C. Tian, H. Yan, et al., Hierarchical MoS<sub>2</sub>@MoP core-shell heterojunction electrocatalysts for efficient hydrogen evolution reaction over a broad pH range, *Nanoscale* 8 (2016) 11052-11059.
- [33] J. Yu, G. Li, H. Liu, et al., Electrochemical flocculation integrated hydrogen evolution reaction of Fe@N-doped carbon nanotubes on iron foam for ultralow voltage electrolysis in neutral media, *Adv. Sci.* 6(18) (2019) 1901458.
- [34] Y. Çimen, A. W. Peters, J. R. Avila, et al., Atomic layer deposition of ultrathin nickel sulfide films and preliminary assessment of their performance as hydrogen evolution catalysts, *Langmuir* 32 (2016) 12005-12012.
- [35] M. Patel, K. K. Joshi, K. H. Modi, et al., CuS nanoparticles: an efficient electrocatalyst for hydrogen evolution reaction in a wide pH range, *Electrochim. Acta* 441 (2023) 141740.
